# Supplementary material for: Spectrum of histiocytic neoplasms associated with diverse haematological malignancies bearing the same oncogenic mutation
Source: PubMed Central journal article supplement — J Pathol Clin Res. 2020 Aug 27;7(1):10–26. doi: 10.1002/cjp2.177 (PMC7737785; doi:10.1002/cjp2.177), 2020-08-27
Supplement: CJP2-7-10-s001.pdf [file CJP2-7-10-s001.pdf]

# **Spectrum of histiocytic neoplasms associated with diverse haematological malignancies bearing the same oncogenic mutation**

Kemps PG *et al*, *J Pathol Clin Res*, DOI: 10.1002/cjp2.177

## **Supplementary Material**

|                |    |
|----------------|----|
| Figure S1..... | 2  |
| Table S1.....  | 3  |
| Table S2.....  | 4  |
| Table S3.....  | 6  |
| Case 1.....    | 8  |
| Case 2.....    | 9  |
| Case 3.....    | 10 |

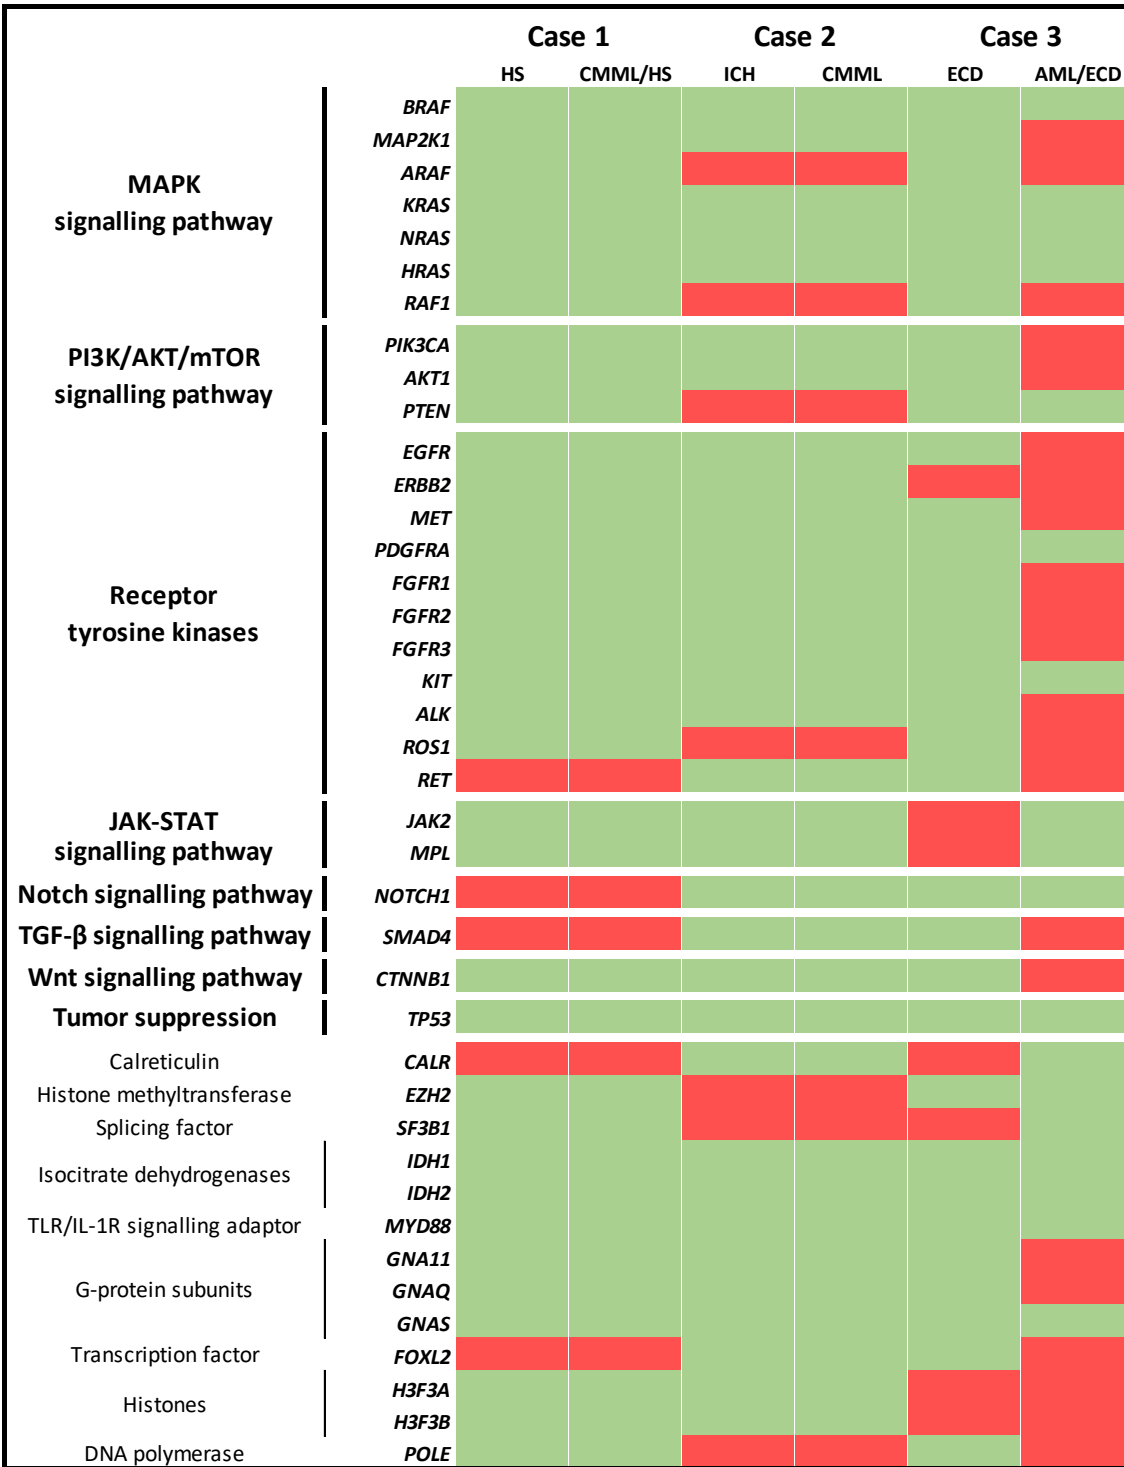

**Figure S1. Coverage of various genes by the different NGS panels used to analyse the affected tissue specimens of the three cases presented in this study.** Genes depicted in green were targeted by the NGS panel used to analyse the tissue specimen(s) affected by the specified neoplasm (represented by a column). Genes depicted in red were not targeted by the NGS panel. Only genes that were targeted by NGS in two or more cases are shown.

**Table S1.** Available PALGA diagnostic terms for the various histiocytic disorders, used to retrieve relevant pathology reports from the Dutch Pathology Registry. Some diagnostic terms are given in Dutch.

| Disorder   | Diagnostic terms                                                                                                                                                                                                                                                       | Corresponding PALGA-codes            |
|------------|------------------------------------------------------------------------------------------------------------------------------------------------------------------------------------------------------------------------------------------------------------------------|--------------------------------------|
| <b>LCH</b> | <ul style="list-style-type: none"> <li>• langerhase cel histiocytose</li> <li>• histiocytose X</li> <li>• eosinofiel granuloom</li> <li>• granuloma eosinophilicum</li> <li>• hand schuller christian</li> <li>• abt letterer siwe</li> <li>• letterer siwe</li> </ul> | M97511<br>M77860<br>M97520<br>M97223 |
| <b>JXG</b> | <ul style="list-style-type: none"> <li>• juveniel xanthogranuloom</li> <li>• xanthogranuloma juveniel</li> <li>• xanthogranuloma juvenile</li> <li>• xanthoendothelioom</li> <li>• naevoxanthoendothelioom</li> </ul>                                                  | M55380                               |
| <b>RH</b>  | <ul style="list-style-type: none"> <li>• reticulohistiocytom</li> <li>• reticulohistiocytair granuloom</li> </ul>                                                                                                                                                      | M77880                               |
| <b>XD</b>  | <ul style="list-style-type: none"> <li>• xanthoma disseminatum</li> </ul>                                                                                                                                                                                              | M55350                               |
| <b>HS</b>  | <ul style="list-style-type: none"> <li>• ml true histiocytic</li> <li>• ml true histiocytic lu</li> <li>• malignant lymphoma true histiocytic lu</li> <li>• histiosarcoom</li> <li>• histiocytosarcoom</li> <li>• histiocytair sarcoom</li> </ul>                      | M97233                               |
| <b>MH</b>  | <ul style="list-style-type: none"> <li>• histiocyttaire medullaire reticulose</li> <li>• maligne histiocytose</li> <li>• histiocyttaire maligniteit</li> <li>• maligniteit histiocyttaire origine</li> </ul>                                                           | M97203<br>T05120M95993               |

| Disorder     | Diagnostic terms                                                                                                                                                                         | Corresponding PALGA-codes |
|--------------|------------------------------------------------------------------------------------------------------------------------------------------------------------------------------------------|---------------------------|
| <b>IDCS</b>  | <ul style="list-style-type: none"> <li>• interdigiterend dendritisch cel sarcoom</li> <li>• metastase interdigiterend dendritisch cel sarcoom</li> </ul>                                 | M88083<br>M88086          |
| <b>ECD</b>   | <ul style="list-style-type: none"> <li>• erdheim chester;</li> <li>• morbus erdheim chester</li> </ul>                                                                                   | M97551                    |
| <b>RDD</b>   | <ul style="list-style-type: none"> <li>• rosai-dorfman ziekte</li> </ul>                                                                                                                 | M75680                    |
| <b>BPDCN</b> | <ul style="list-style-type: none"> <li>• blastaire plasmacytoide dendritische cel neplasie</li> <li>• blastair NK-cel lymfoom</li> <li>• agressieve blastaire NK-cel leukemie</li> </ul> | M98753<br>M97503          |

| Abbreviation | Disorder                                     |
|--------------|----------------------------------------------|
| <b>LCH</b>   | Langerhans cell histiocytosis                |
| <b>JXG</b>   | juvenile xanthogranuloma                     |
| <b>RH</b>    | reticulohistiocytosis                        |
| <b>XD</b>    | xanthoma disseminatum                        |
| <b>HS</b>    | histiocytic sarcoma                          |
| <b>MH</b>    | malignant histiocytosis                      |
| <b>IDCS</b>  | interdigitating dendritic cell sarcoma       |
| <b>ECD</b>   | Erdheim-Chester disease                      |
| <b>RDD</b>   | Rosai-Dorfman disease                        |
| <b>BPDCN</b> | blastic plasmacytoid dendritic cell neoplasm |



Extra abbreviations: UC, unclassifiable; NC, not classified; WES, whole-exome sequencing; SNP, single-nucleotide polymorphism; PCR, polymerase chain reaction; NGS, next-generation sequencing; FISH, fluorescence in situ hybridisation; WGS, whole-genome sequencing; aCGH, array comparative genomic hybridisation; HRM, high resolution melt analysis; NR, not relevant.

<sup>1</sup> According to the revised classification of histiocytoses and neoplasms of the macrophage-dendritic cell lineages (Emile JF, et al. *Blood* 2016).

<sup>2</sup> Follow-up is depicted as the time in months (m) or years (y) since the diagnosis of the last presenting disorder (histiocytic neoplasm or additional haematological malignancy).

<sup>3</sup> A *NRAS* p.G12S mutation and homozygous deletion at 9p21, including *CDKN2A*, was also detected in the T-ALL sample using WES and SNP array analysis. LCH specimens were not available for these analyses.

<sup>4</sup> LCH was first diagnosed in the temporal bone 40 years before HL diagnosis. One year after complete remission for HL, LCH was diagnosed for the second time in the os ileum. The molecular analysis was performed on the os ileum LCH sample.

<sup>5</sup> This patient developed evolving acute myeloid leukaemia in the setting of chronic high-grade myelodysplastic syndrome and refractory anaemia with excess blasts. Targeted treatment with enasidenib, an *IDH2* inhibitor, for progression of the myelodysplastic syndrome resulted in stable cutaneous LCH. Thus, at least the patient's LCH and MDS were concurrently present.

<sup>6</sup> The patient was initially diagnosed with concurrent ECD and multiple myeloma. Molecular analysis of the multiple myeloma was precluded by the absence of material.

<sup>7</sup> AML with at least phenotypic monocytic differentiation.

<sup>8</sup> Age at onset of xanthelasma-like ECD lesions, not age at diagnosis of ECD.

<sup>9</sup> Age at onset of the ICH lesion, not age at onset of the first presenting disorder (CMML), as this age was not reported.

<sup>10</sup> The patient also had a mediastinal germ cell tumour (MGCT). The existence of a common precursor was suggested by the demonstration of a *TP53* mutation in all three neoplasms (MGCT, HS, CMML) and identical chromosomal aberrations in the HS and the MGCT.

<sup>11</sup> The patient also had a metastatic non-seminomatous germ cell tumour with yolk sac component (NSGCT). The existence of a common precursor was suggested by the demonstration of the same *TP53* and *BCOR* mutations in all three neoplasms (NSGCT, HS, MDS).

<sup>12</sup> Died after this time period after the onset of the HS. The diagnosis of HS was made post-mortem.

<sup>13</sup> The histiocytic sarcoma responded to targeted therapy with dabrafenib and trametinib.

<sup>14</sup> Off-label trametinib was obtained, and the patient started therapy as a maintenance approach. Unfortunately, symptoms of graft-versus-host disease worsened, and treatment had to be discontinued after 2 weeks.

<sup>15</sup> Although histopathological examination of bone marrow revealed only 2% involvement by CLL cells (compared with 40% before starting ibrutinib therapy).

<sup>16</sup> The original FL was accompanied by an unusual histiocytic reaction without overt malignant features.

<sup>17</sup> The patient also developed DLBCL 7 years before and several months after LCS diagnosis. Molecular analysis of these tumours was precluded by the absence of material.

<sup>18</sup> In addition, 11 variants that are presumably germline polymorphisms were detected.

<sup>19</sup> *FLT3* p.A680V, *KRAS* p.V14I, *ETV6* p.R378X, *EZH2* p.V626M, *GATA2* loss, *BCOR* p.R342X, *PTPN11* p.T553M, and *PAK3* p.S156L were detected using NGS in the AML sample. The non-LCH samples were not analyzed for genetic alterations involving these genes.

<sup>20</sup> At diagnosis of non-LCH, complete blood count already revealed 2% blasts. Thus, there may have been concurrent AML at non-LCH diagnosis.

<sup>21</sup> Non-LCH evolved to AML in bone marrow.

<sup>22</sup> These mutations are depicted as such in Figure 2A of the manuscript (Patnaik MM, *Blood Cancer J* 2018), but other mutations in *TRMT61B* (p.T219C), *STK3* (p.N207fs) and *DIP2A* (p.R373W) are described in the text of this article.

<sup>23</sup> At diagnosis of CMML, plasmacytoid dendritic cell nodules were present in a bone marrow biopsy, comprising ~20% of bone marrow cellularity.

<sup>24</sup> The additional haematological malignancy evolved to BPDCN in the bone marrow.

# On condition that the histiocytic neoplasm and/or additional haematological malignancy was/were analysed for the genetic alteration(s) detected in the associated neoplasm. This information was not reported.

**Table S3.** Reported patients with histiocytic neoplasms associated with additional haematological malignancies bearing the same genetic alteration(s) as demonstrated by techniques other than DNA sequencing and/or DNA methylation profiling.

| Nr | P/A | Age               | G   | Histiocytic classification <sup>1</sup> | Histiocytic neoplasm | Additional haematological malignancy | Analysis method                                          | Shared genetic alteration(s)                                                     | Shared TCR or Ig rearrangements                    | Unique genetic alteration(s)                                                                                                           | Interval                                                      | Concurrently present | Outcome (follow-up) <sup>2</sup> | Reference                                         |                                   |
|----|-----|-------------------|-----|-----------------------------------------|----------------------|--------------------------------------|----------------------------------------------------------|----------------------------------------------------------------------------------|----------------------------------------------------|----------------------------------------------------------------------------------------------------------------------------------------|---------------------------------------------------------------|----------------------|----------------------------------|---------------------------------------------------|-----------------------------------|
| 1  | A   | 61y               | F   | L group                                 | LCH                  | MS/AML-M2                            | Cytogenetics (AML) and FISH (LCH, MS and AML)            | Trisomy 8                                                                        | NR                                                 | N/A                                                                                                                                    | Concurrent <sup>3</sup>                                       | Yes                  | Died (4m)                        | Schmitt-Graeff AH, <i>Leukemia</i> 2012.          |                                   |
| 2  | A   | 68y               | M   | L group                                 | LCH                  | T/myeloid MPAL                       | FISH                                                     | Trisomy 21                                                                       | N/A                                                | N/A                                                                                                                                    | Concurrent                                                    | Yes                  | N/A                              | Yohe SL, <i>Mod Pathol</i> 2014.                  |                                   |
| 3  | A   | 52y               | F   | L group                                 | LCH                  | CLL                                  | FISH                                                     | Del(17p)                                                                         | Yes (IgH)                                          | LCH: <b>TP53</b> p.P92L, <b>BRAF</b> p.V600E and <b>STK11</b> p.M335T <sup>4</sup> ; CLL: <b>TP53</b> p.P191del                        | LCH diagnosis 11 years after CLL diagnosis                    | Yes <sup>4</sup>     | N/A                              | Frauenfeld L, <i>Virchows Arch</i> 2019.          |                                   |
| 4  | N/A | N/A               | N/A | L group                                 | LCH                  | FL                                   | N/A                                                      | t(14;18) <b>IGH-BCL2</b> fusion                                                  | N/A                                                | N/A <sup>5</sup>                                                                                                                       | LCH diagnosis 5 years after FL diagnosis                      | N/A                  | N/A                              | Facchetti F, <i>Virchows Archiv</i> 2017.         |                                   |
| 5  | A   | 77y               | F   | L group                                 | LCH                  | FL                                   | FISH                                                     | t(14;18) <b>IGH-BCL2</b> fusion                                                  | Yes (IgK)                                          | N/A                                                                                                                                    | Concurrent                                                    | Yes                  | N/A                              | West DS, <i>Am J Surg Pathol</i> 2013.            |                                   |
| 6  | A   | 59y <sup>6</sup>  | M   | C group                                 | RH                   | SM & AML                             | FISH (RH); karyotyping (mixed RH, SM & AML) <sup>7</sup> | Der(1;9)                                                                         | NR                                                 | N/A                                                                                                                                    | RH diagnosis 1 year before SM & AML diagnosis                 | Yes                  | Alive (30m)                      | Fusco N, <i>Histopathology</i> 2017.              |                                   |
| 7  | A   | 84y               | M   | C group                                 | GEH                  | CMML                                 | FISH (GEH); karyotyping (CMML)                           | Loss of Y chromosome                                                             | NR                                                 | N/A <sup>8</sup>                                                                                                                       | GEH diagnosis shortly after CMML diagnosis                    | Yes                  | Died (4m)                        | Shon W, <i>J Cutan Pathol</i> 2013.               |                                   |
| 8  | A   | 70y               | M   | M group                                 | HS                   | CMML                                 | FISH                                                     | Aneuploidy of chromosome 8                                                       | NR                                                 | HS cells were tetraploid, while CMML cells were diploid.                                                                               | Concurrent                                                    | Yes                  | Alive (<1y)                      | Mori M, <i>Int J Hematol</i> 2010.                |                                   |
| 9  | A   | 72y <sup>9</sup>  | M   | M group                                 | HS                   | CML                                  | FISH (HS); N/A (CML)                                     | t(9;22) <b>BCR-ABL1</b> fusion                                                   | NR                                                 | N/A <sup>10</sup>                                                                                                                      | HS diagnosis 30 months after CML diagnosis                    | No                   | Died (1m)                        | Ansari J, <i>Eur J Hematol</i> 2016.              |                                   |
| 10 | P   | 5y                | M   | M group                                 | HS                   | T-ALL                                | FISH (HS); karyotyping (T-ALL)                           | t(7;11) <b>CDKN2A</b> deletion on both chromosomes 9                             | N/A                                                | N/A                                                                                                                                    | HS diagnosis 6 months after T-ALL diagnosis                   | No                   | Died (N/A)                       | Castro ECC, <i>Pediatr Dev Pathol</i> 2010.       |                                   |
| 11 | P   | 4y                | M   | M group                                 | HS                   | B-ALL                                | FISH (non-LCH & B-ALL); karyotyping (B-ALL)              | Homozygous deletion of the <b>CDKN2A</b> locus at 9p21                           | Yes (TCRγ and IgH)                                 | N/A                                                                                                                                    | HS diagnosis several months after B-ALL diagnosis             | No                   | Died (1y)                        | Kumar R, <i>Pediatr Blood Cancer</i> 2011.        |                                   |
| 12 | P   | 7y                | M   | M group                                 | HS                   | B-ALL                                | FISH (HS); karyotyping (B-ALL)                           | t(8;14), including <b>MYC</b>                                                    | N/A                                                | N/A                                                                                                                                    | HS diagnosis 6 months after B-ALL diagnosis                   | No                   | Alive (N/A)                      | Castro ECC, <i>Pediatr Dev Pathol</i> 2010.       |                                   |
| 13 | A   | 64y               | F   | M group                                 | HS                   | CLL                                  | Karyotyping                                              | Trisomy 12                                                                       | N/A for the CLL                                    | HS: t(5;14)(q32;q32), +der(12), t(8;12)(qter > q21;p21 > q22), +del(21), t(21;7)(qter;?)                                               | HS diagnosis 8 years after CLL diagnosis                      | Yes                  | Died (1.5m)                      | Wetzler M, <i>Cancer</i> 1995.                    |                                   |
| 14 | A   | 70y               | M   | M group                                 | HS                   | CLL/SLL                              | FISH                                                     | Homozygous deletion of 13q14                                                     | N/A                                                | HS: a complex, near-tetraploid karyotype                                                                                               | HS diagnosis 8 years after CLL diagnosis                      | Yes                  | Died (3m)                        | Skala SL, <i>Clin Pathol</i> 2019.                |                                   |
| 15 | A   | 85y               | M   | M group                                 | HS                   | CLL/SLL                              | FISH                                                     | Del(17p)                                                                         | Yes (IgH)                                          | IDCS: deletion of 13q                                                                                                                  | Concurrent                                                    | Yes                  | N/A                              | Shao H, <i>Mod Pathol</i> 2011.                   |                                   |
| 16 | N/A | N/A               | N/A | M group                                 | HS                   | MM                                   | N/A                                                      | t(11;14) <b>CCND1-IgH</b> fusion                                                 | Yes (IgH and IgK)                                  | N/A                                                                                                                                    | HS diagnosis 1 year after MM diagnosis                        | N/A                  | N/A <sup>11</sup>                | Facchetti F, <i>Virchows Archiv</i> 2017.         |                                   |
| 17 | A   | 56y               | F   | M group                                 | HS                   | MCL                                  | FISH                                                     | t(11;14) <b>CCND1-IgH</b> fusion                                                 | Yes (IgH)                                          | N/A                                                                                                                                    | HS diagnosis >2.5 years after MCL diagnosis                   | Yes                  | Alive (N/A)                      | Hure MC, <i>J Clin Oncol</i> 2012.                |                                   |
| 18 | A   | 61y               | F   | M group                                 | HS                   | DLBCL <sup>12</sup>                  | FISH                                                     | t(14;18) <b>IGH-BCL2</b> fusion                                                  | Yes (IgH)                                          | N/A                                                                                                                                    | HS diagnosis 17 months before DLBCL diagnosis                 | No <sup>13</sup>     | Died (2.5m)                      | Wang E, <i>Am J Surg Pathol</i> 2011.             |                                   |
| 19 | A   | 50y               | M   | M group                                 | HS                   | DLBCL & FL                           | FISH                                                     | t(14;18) <b>IGH-BCL2</b> fusion                                                  | N/A                                                | N/A                                                                                                                                    | Concurrent                                                    | Yes                  | N/A                              | Zhang D, <i>Int J Hematol</i> 2009.               |                                   |
| 20 | A   | 53y               | M   | M group                                 | HS                   | DLBCL & FL                           | FISH & karyotyping                                       | t(14;18)(18q21)                                                                  | Yes (IgH, between the HS and FL; DLBCL not tested) | HS: +X, add(1)(p36),add(6)(q27), del(6)(q23),del(9)(p22), +12,dup(13)(q13q31),cp5; FL: +2,del(6)(q14), +8,t(14;18)(q32;q21), +17[cp8]. | Concurrent HS and DLBCL diagnosed 13 years after FL diagnosis | Yes                  | Died (<1y)                       | Bassarova A, <i>J Hematop</i> 2009.               |                                   |
| 21 | P   | 1y                | M   | M group                                 | HS                   | BL                                   | N/A                                                      | t(8;14) <b>IGH-MYC</b> fusion                                                    | N/A                                                | N/A                                                                                                                                    | N/A                                                           | N/A                  | N/A                              | Died (N/A)                                        | Minard-Colin V, <i>NEJM</i> 2020. |
| 22 | A   | 76y <sup>14</sup> | F   | M group                                 | HS                   | FL                                   | N/A                                                      | <b>BCL2/MYC</b> double hit translocation                                         | Yes (IgH)                                          | N/A                                                                                                                                    | HS diagnosis 8 years after FL diagnosis                       | Yes                  | N/A                              | Facchetti F, <i>Virchows Archiv</i> 2017.         |                                   |
| 23 | N/A | N/A               | N/A | M group                                 | HS                   | FL                                   | N/A                                                      | <b>BCL2</b> rearrangement                                                        | N/A                                                | N/A <sup>15</sup>                                                                                                                      | HS diagnosis 1 year after FL diagnosis                        | N/A                  | Alive (N/A) <sup>16</sup>        | Facchetti F, <i>Virchows Archiv</i> 2017.         |                                   |
| 24 | A   | 77y               | F   | M group                                 | HS                   | FL                                   | FISH <sup>17</sup>                                       | <b>BCL2</b> translocation                                                        | N/A                                                | N/A                                                                                                                                    | Concurrent                                                    | Yes                  | N/A                              | Fernandez-Pol S, <i>Hum Pathol</i> 2016.          |                                   |
| 25 | A   | 62y               | F   | M group                                 | HS                   | FL                                   | FISH                                                     | t(14;18) <b>IGH-BCL2</b> fusion                                                  | N/A                                                | N/A <sup>18</sup>                                                                                                                      | HS diagnosis 2 years after FL diagnosis                       | Yes                  | N/A                              | Mehrotra S, <i>Diagn Cytopathol</i> 2015.         |                                   |
| 26 | A   | 75y <sup>19</sup> | M   | M group                                 | HS                   | FL                                   | FISH                                                     | <b>BCL2</b> rearrangement                                                        | N/A                                                | N/A                                                                                                                                    | HS diagnosis 13 years after FL diagnosis                      | Yes                  | Alive (16m)                      | Farris M, <i>Clin Lymphoma Myeloma Leuk</i> 2019. |                                   |
| 27 | N/A | N/A               | N/A | M group                                 | LCS                  | FL                                   | N/A                                                      | t(14;18) <b>IGH-BCL2</b> fusion                                                  | No (only IGH clonality in the FL)                  | N/A                                                                                                                                    | LCS diagnosis 10 years after FL diagnosis                     | No                   | N/A                              | Facchetti F, <i>Virchows Archiv</i> 2017.         |                                   |
| 28 | A   | 66y               | M   | M group                                 | LCS                  | FL                                   | FISH                                                     | <b>BCL6</b> split                                                                | Yes (IgH)                                          | N/A                                                                                                                                    | Concurrent                                                    | Yes                  | Died (<1m)                       | Shimono J, <i>Pathol Int</i> 2018.                |                                   |
| 29 | A   | 62y               | M   | M group                                 | LCS                  | DLBCL                                | FISH                                                     | t(14;18)(18q21)                                                                  | Yes (IgH)                                          | N/A                                                                                                                                    | HS diagnosis 1 year after DLBCL diagnosis                     | No                   | Died (<1y)                       | Bassarova A, et al. <i>J Hematop</i> 2009.        |                                   |
| 30 | A   | 68y <sup>20</sup> | F   | M group                                 | LCS                  | CLL/SLL                              | FISH                                                     | Loss of 6q23                                                                     | N/A                                                | LCS: <b>BRAF</b> p.V600E                                                                                                               | LCS diagnosis 6 years after CLL diagnosis                     | Yes                  | Died (<1y)                       | Chen W, <i>N Am J Med Sci</i> 2013.               |                                   |
| 31 | A   | 66y               | F   | M group                                 | LCS                  | HCL                                  | Karyotyping                                              | +4,del(6)(q23),del(8)(p21)x2,+12, del(14)(q24), add(17)(p13)                     | Yes (Ig, not further specified)                    | LCS: monosomy 13                                                                                                                       | LCS diagnosis 8.5 years after HCL diagnosis                   | Yes                  | Died (<1y)                       | Muslimani A, <i>Ann Hematol</i> 2012.             |                                   |
| 32 | N/A | N/A               | N/A | M group                                 | LCS                  | T-ALL                                | N/A                                                      | Deletions of <b>TLX3</b> at 5q35, <b>TRA/TRD</b> at 14q11 and <b>TRG</b> at 7p14 | Yes (TCRβ and TCRγ)                                | N/A <sup>21</sup>                                                                                                                      | LCS diagnosis 2 years after T-ALL diagnosis                   | No                   | N/A                              | Facchetti F, <i>Virchows Archiv</i> 2017.         |                                   |
| 33 | A   | 59y               | F   | M group                                 | ICS                  | T-LBL                                | N/A                                                      | Trisomy 21                                                                       | N/A                                                | T-LBL: <b>NRAS</b> p.G13D and monosomy 18                                                                                              | Concurrent                                                    | Yes                  | Died (3y)                        | Buser L, <i>Pathobiology</i> 2014.                |                                   |
| 34 | A   | 65y <sup>22</sup> | M   | M group                                 | IDCS                 | CLL/SLL                              | FISH                                                     | Del(17p)                                                                         | Yes (IgK)                                          | N/A                                                                                                                                    | IDCS diagnosis 3 years after CLL/SLL diagnosis                | Yes                  | Died (4.5m)                      | Shao H, <i>Mod Pathol</i> 2011.                   |                                   |
| 35 | A   | 55y               | F   | M group                                 | IDCS                 | FL                                   | FISH                                                     | t(14;18)                                                                         | Yes (IgH)                                          | N/A                                                                                                                                    | Concurrent                                                    | Yes                  | N/A                              | Feldman AL, <i>Blood</i> 2008.                    |                                   |
| 36 | A   | 66y               | M   | UC                                      | Atyp. non-LCH        | B-ALL                                | FISH (non-LCH & B-ALL); karyotyping (B-ALL)              | Trisomy 11                                                                       | N/A                                                | N/A                                                                                                                                    | Atyp. non-LCH diagnosis 18 months after B-ALL diagnosis       | No                   | Alive (N/A)                      | Castro ECC, <i>Pediatr Dev Pathol</i> 2010.       |                                   |
| 37 | A   | 18y               | M   | UC                                      | Atyp. non-LCH        | B-ALL                                | FISH (non-LCH & B-ALL); karyotyping (B-ALL)              | Trisomy 5                                                                        | N/A                                                | N/A                                                                                                                                    | Atyp. non-LCH diagnosis 16 months after B-ALL diagnosis       | No                   | Died (N/A)                       | Castro ECC, <i>Pediatr Dev Pathol</i> 2010.       |                                   |
| 38 | A   | 59y               | F   | NC                                      | BIDCT                | CMML                                 | FISH                                                     | Trisomy 8                                                                        | N/A                                                | N/A                                                                                                                                    | BIDCT diagnosis after CMML diagnosis                          | N/A                  | Alive (4.5m)                     | Vitte F, <i>Am J Surg Pathol</i> 2012.            |                                   |

Extra abbreviations: RH, reticulohistiocytosis; GEH, generalised eruptive histiocytosis; ICS, indeterminate cell sarcoma; BIDCT, blastic indeterminate dendritic cell tumour; MS, myeloid sarcoma; SM, systemic mastocytosis; CML, chronic myeloid leukaemia; MM, multiple myeloma; MCL, mantle cell lymphoma; BL, Burkitt's lymphoma; LBL, lymphoblastic lymphoma.

<sup>1</sup> According to the revised classification of histiocytoses and neoplasms of the macrophage-dendritic cell lineages (Emile JF, et al. *Blood* 2016).

<sup>2</sup> Follow-up is depicted as the time in months (m) or years (y) since the diagnosis of the last presenting disorder (histiocytic neoplasm or additional haematological malignancy).

<sup>3</sup> A bone marrow aspirate at diagnosis of mixed LCH/MS revealed 7% myeloblasts and an isolated trisomy 8, consistent with a refractory anaemia with blast excess-1 (RAEB-1). One month after mixed LCH/MS diagnosis, overt AML developed.

<sup>4</sup> In the LCH sample, the *TP53* p.P191del mutation was detected with a VAF of 3%, probably due to rare contaminating CLL cells.

<sup>5</sup> The LCH sample stained positive for BRAF-VE1. It was not reported whether a FL specimen was stained for BRAF-VE1.

<sup>6</sup> The patient had been diagnosed with RH 1 year earlier.

<sup>7</sup> Karyotyping was performed on whole bone marrow, consisting of SM, AML, and a nodular histiocytic infiltrate consistent with localisation of reticulohistiocytosis. Therefore, the authors could not formally demonstrate the cellular origin of the clones bearing the cytogenetic alterations that were detected in the bone marrow, and which were confirmed in the RH-affected dermal lesions. Thus, it is not completely certain that the SM & AML carried the der(1;9).

<sup>8</sup> A *JAK2* p.V617F mutation was detected in the CMML. It was not reported whether the GEH was analysed for this mutation as well.

<sup>9</sup> The patient was diagnosed with CML 30 months prior.

<sup>10</sup> WES of the HS revealed 11,893 missense single nucleotide variants (SNVs), 192 insertion variants, and 292 deletion variants (indels) which cause frameshifts. Among common B-cell-regulating genes, missense variants were identified in two genes, including *EBF1* (p.R381G) and *BLIMP1* (p.D203E). Heterozygous SNV was also seen in *BRAF* (rs140449071, rs140449150).

<sup>11</sup> The patient was unsuccessfully treated with Velcade + Dexamethasone.

<sup>12</sup> This patient had a remote history of FL, diagnosed 17 years before HS diagnosis. On account of the remote clinical history, the original specimen with FL could not be obtained, precluding genotypic comparison of IgH gene rearrangement products between the original FL and subsequent HS or DLBCL by the authors.

<sup>13</sup> At time of HS diagnosis, a staging bone marrow biopsy showed a low level of involvement by FL, but no evidence of HS. Thus, FL and HS were concurrently present.

<sup>14</sup> Age at diagnosis of the follicular lymphoma.

<sup>15</sup> The HS stained positive for BRAF-VE1. In addition, mutations involving the genes *BCL2*, *BCL10*, *CDKN1B*, *KIT* and *MAP2K1* were detected. It was not reported whether the FL was analysed for these genetic alterations as well.

<sup>16</sup> The patient was unsuccessfully treated with Rituximab + Bendamustine. Yet, a MEK inhibitor as single agent induced a complete response in this highly compromised patient with multifocal disease.

<sup>17</sup> Apart from the HS-affected liver biopsy, FISH was performed on a mixed HS/FL bone marrow biopsy, revealing "a variable 5'/3' *BCL2* signal separation pattern in 18 (9%) of nuclei, further supporting the diagnosis of follicular lymphoma". The authors did not report the type of cells that showed the *BCL2* rearrangement.

<sup>18</sup> A *BRAF* p. V600E mutation was detected in the HS. It was not reported whether the FL was analysed for this mutation as well.

<sup>19</sup> Age at diagnosis of mixed HS/FL. The patient was diagnosed with FL 13 years before.

<sup>20</sup> Six years before, the patient was diagnosed with CLL.

<sup>21</sup> A *BRAF* p.V600E mutation was detected in the LCS using BRAF-VE1 immunohistochemistry and direct sequencing. It was not reported whether the T-ALL was analysed for this mutation as well.

<sup>22</sup> Age at presentation with the IDCS.

# On condition that the histiocytic neoplasm and/or additional haematological malignancy was/were analysed for the genetic alteration(s) detected in the associated neoplasm. This information was not reported.

## Case 1

### First bone marrow biopsy (HS)

#### **Next generation sequencing**

Material: hematoxylin-stained slides

NGTS panel: Cancer Hotspot Panel version 2.0 (CHPv2.0)

NGTS platform: Single molecule Molecular Inversion Probe (smMIP)-based sequence analysis using a NextSeq 500 sequencer.

Genes analyzed: AKT1 [NM\_005163.2]: codon 17, BRAF [NM\_004333.4]: codon 582-615, CTNNB1 [NM\_001904.3]: codon 19-48, CXCR4 [NM\_001008540.1]: codon 281-357, EGFR [NM\_005228.3]: codon 434-499, 688-823, 849-875, ERBB2 [NM\_004448.3]: codon 770-785, EZH2 [NM\_004456.4]: codon 471-502, 618-645, 679-704, GNA11 [NM\_002067.4]: codon 183 and 209, GNAQ [NM\_002072.4]: codon 183 and 209, GNAS [NM\_000516.5]: codon 201 and 227, H3F3A [NM\_002107.4]: codon 28 and 35, H3F3B [NM\_005324.4]: codon 37, HRAS [NM\_005343.3]: codon 12, 13, 59 and 61, IDH1 [NM\_005896.3]: codon 132, IDH2 [NM\_002168.3]: codon 140 and 172, JAK2 [NM\_004972.3]: codon 617, KIT [NM\_000222.2]: codon 412-513, 550-591, 628-713, 799-828, KRAS [NM\_004985.4]: codon 12, 13, 59, 61, 117 and 146, MPL [NM\_005373.2]: codon 515, MYD88 [NM\_002468.4]: codon 169-280, NRAS [NM\_002524.4]: codon 12, 13, 59, 61, 117 and 146, PDGFRA [NM\_006206.4]: codon 552-596, 632-667, 814-848, PIK3CA [NM\_006218.2]: codon 520-554, 1020-1069, SF3B1 [NM\_012433.2]: codon 603-671, 694-727, 833-906.

Variant(s) detected:

Mutation in KRAS [NM\_004985.4] exon 3; c.176C>A; p.A59E, variant allele frequency: 30%, 65/217 unique reads.

#### **Next generation sequencing**

Material: hematoxylin-stained slides

NGTS panel: Predictive Analysis for THERapy version 2.0 DNA (PATHv2D) Panel

NGTS platform: Single molecule Molecular Inversion Probe (smMIP)-based sequence analysis using a NextSeq 500 sequencer.

Genes analyzed: AKT1 [NM\_005163.2]: codon 17, AKT2 [NM\_001626.5]: codon 17, AKT3 [NM\_181690.2]: codon 17, ALK [NM\_004304.4]: codon 1059-1150, 1173-1278, ARAF [NM\_001654.4]: codon 214, BRAF [NM\_004333.4]: codon 455-488, 566-580, 594-605, DDR2 [NM\_006182.2]: codon 503-856, EGFR [NM\_005228.4]: codon 434-499, 688-875, ERBB2 [NM\_004448.3]: codon 310, 650-695, 737-883, GNA11 [NM\_002067.4]: codon 183 and 209, GNAQ [NM\_002072.4]: codon 183 and 209, GNAS [NM\_000516.5]: codon 201 and 227, HRAS [NM\_005343.3]: codon 12, 13, 59 and 61, IDH1 [NM\_005896.3]: codon 132, IDH2 [NM\_002168.3]: codon 140 and 172, JAK2 [NM\_004972.3]: codon 617, KIT [NM\_000222.2]: codon 412-513, 550-591, 640-787, 799-850, KRAS [NM\_004985.4]: codon 12, 13, 59, 61, 117 and 146, MAP2K1 [NM\_002755.3]: codon 28-231, MET [NM\_001127500.2]: codon 168, 375, 982-1027, 1230-1284, 1304, including exon 14 (-90, +20bp), MTOR [NM\_004958.3]: 1458-1489, 1789-1820, 1971-1995, 2194-2220, 2404-2433, 2484-2509, NRAS [NM\_002524.4]: codon 12, 13, 59, 61, 117 and 146, PDGFRA [NM\_006206.5]: codon 552-595, 632-667, 824-848, PIK3CA [NM\_006218.3]: codon 345, 420, 539-554, 1043-1050, POLE [NM\_006231.3]: codon 268-491, PTEN [NM\_000314.6]: codon 86-267, 276-342, RAF1 [NM\_002880.3]: codon 257-261, ROS1 [NM\_002944.2]: codon 1927-2189, TP53 [NM\_000546.5]: >94% of the coding sequence, markers BAT25, BAT26, NR21, NR24 and NR27 for microsatellite instability (MSI) analysis. Gene amplifications: ALK, BRAF, EGFR, ERBB2, FGFR1 [NM\_001174063.1], FGFR2 [NM\_000141.4], FGFR3 [NM\_000142.4], KIT, KRAS, MDM2 [NM\_002392.5], MET, PDGFRA, PIK3CA.

Variant(s) detected:

Mutation in KRAS [NM\_004985.4] exon 3; c.176C>A; p.A59E, variant allele frequency: 34%, 55/162 unique reads.

Mutation in MAP2K1 [NM\_002755.3] exon 2; c.159T>G; p.F53L, variant allele frequency: 3.8%, 15/395 unique reads.

Mutation in RAF1 [NM\_002880.3] exon 7; c.770C>T; p.S257L, variant allele frequency: 7.9%, 31/392 unique reads.



## Second bone marrow biopsy (CMML/HS)

### **Next generation sequencing**

Material: hematoxylin-stained slides

NGTS panel: CHPv2.0

NGTS platform: smMIP-based sequence analysis using a NextSeq 500 sequencer.

Variant(s) detected:

Mutation in KRAS [NM\_004985.4] exon 3; c.176C>A; p.A59E, variant allele frequency: 40%, 30/75 unique reads.

### **Next generation sequencing**

Material: hematoxylin-stained slides

NGTS panel: PATHv2D Panel

NGTS platform: smMIP-based sequence analysis using a NextSeq 500 sequencer.

Variant(s) detected:

Mutation in KRAS [NM\_004985.4] exon 3; c.176C>A; p.A59E, variant allele frequency: 42%, 50/120 unique reads.

Mutation in MAP2K1 [NM\_002755.3] exon 2; c.159T>G; p.F53L, variant allele frequency: 2%, 8/404 unique reads.

Variant with too low coverage for adequate variant calling:

Mutation in RAF1 [NM\_002880.3] exon 7; c.770C>T; p.S257L, variant allele frequency: 0.7%, 2/306 unique reads.

NOTE: This is below the detection limit of the NGS assay. In addition, it comprises a C>T change, and may be an FPPE artefact.

## *Case 2*

### Skin biopsy (ICH)

#### **Next generation sequencing**

Material: hematoxylin-stained slides

NGTS panel: NGS OPv3.0

Genes (exons) analyzed:

AKT1 [NM\_005163] (3, 6), ALK [NM\_004304] (15, 22-25), BRAF [NM\_004333] (11, 15), CALR [NM\_004343] (9), CD79B [NM\_001039933] (5), CTNNB1 [NM\_001904] (3), EGFR [NM\_005228] (12, 18-21), ERBB2 [NM\_004448] (8, 19-21), FGFR1 [NM\_023110] (4, 7), FGFR2 [NM\_001144915] (6, 8, 11), FGFR3 [NM\_001163213] (7, 9, 14, 16, 18), FOXL2 [NM\_023067] (1), GNA11 [NM\_002067] (4, 5), GNAQ [NM\_002072] (4, 5), GNAS [NM\_000516] (8, 9), H3F3A [NM\_002107] (2), H3F3B [NM\_005324] (2), HRAS [NM\_176795] (2,3), IDH1 [NM\_005896] (4), IDH2 [NM\_002168] (4), JAK2 [NM\_004972] (14), KIT [NM\_000222] (2, 8-11, 13-15, 17, 18), KRAS [NM\_033360] (2-4), MAP2K1 [NM\_002755] (2, 3, 6), MET [NM\_000245] (2, 14, 16, 19), MPL [NM\_005373] (10), MYD88 [NM\_002468] (3, 5), NOTCH1 [NM\_017617] (26, 27, 34), NRAS [NM\_002524] (2-4), PDGFRA [NM\_006206] (12, 14, 15, 18), PIK3CA [NM\_006218] (10, 14, 21), RB1 [NM\_000321] (4, 6, 10, 11, 14, 17, 18, 20-22), RET [NM\_020975] (10, 11, 13, 15, 16), RHOA [NM\_001664] (2), SMAD4 [NM\_005359] (3-6, 8-12), TP53 [NM\_000546] (2, 4-8, 10).

Variant(s) detected:

Mutation in NRAS (NM\_002524) exon 2; c.35G>T; p.G12V, variant allele frequency: 20%, 630/3168 reads.

### Bone marrow biopsy (CMML)

#### **Next generation sequencing**

Material: hematoxylin-stained slides

NGTS panel: NGS OPv3.0

Variant(s) detected:

Mutation in NRAS (NM\_002524) exon 2; c.35G>T; p.G12V, variant allele frequency: 42%, 895/2133 reads.

### Case 3

#### First bone marrow biopsy (mixed MM/ECD bone marrow)

##### Next generation sequencing

Material: hematoxylin-stained slides, DNA isolated in duplicate

NGTS panel: Diagnostics Panel version 5.0 (DPv5.0).

Genes (exons) analyzed:

Coding sequence: CDKN2A (coverage: 98 %), PTEN (94 %) and TP53 (100 %).

Mutation hotspots: AKT1 (exon: 3), ALK (20, 22-25), APC (14), ARAF (7), BRAF (11, 15), CTNNB1 (3, 7, 8), EGFR (18-21), EZH2 (16), FBXW7 (9, 10), FOXL2 (1), FGFR1 (4, 7, 12), FGFR2 (7, 9, 12), FGFR3 (7, 9), GNA11 (4, 5), GNAQ (4, 5), GNAS (8, 9), HER2 (19-21), HRAS (2-4), IDH1 (4), IDH2 (4), KIT (8, 9, 11, 13, 14, 17), KRAS (2-4), MAP2K1 (2, 3), MET (2, 14, 19), MYD88 (5), NOTCH1 (26, 27), NRAS (2-4), PDGFRA (12, 14, 18), PIK3CA (10, 21), POLD1 (12), POLE (9, 13), RAF1 (7), RET (11, 16), RNF43 (3, 4, 9), ROS1 (38, 41), SMAD4 (3, 9, 12) and STK11 (4, 5, 8).

Variant(s) detected:

Analysis 1<sup>st</sup> DNA isolate: mutation in NRAS (NM\_002524) exon 3; c.182A>G; p.Q61R, variant allele frequency: 69%, 18/26 reads

Analysis 2<sup>nd</sup> DNA isolate: mutation in NRAS (NM\_002524) exon 3; c.182A>G; p.Q61R, variant allele frequency: 18%, 6/33 reads

NOTE: Number of amplicons with low coverage (<100 reads), which may cause mutations to be missed:

1<sup>st</sup> DNA isolate: 161/171 amplicons, including in BRAF.

2<sup>nd</sup> DNA isolate: 152/171 amplicons, including in BRAF.

Sanger sequencing of NRAS exon 3 using the 2<sup>nd</sup> DNA isolate confirmed the presence of the NRAS c.182A>G; p.Q61R mutation. Sanger sequencing of the 1<sup>st</sup> DNA isolate was not possible due to insufficient amount of DNA.

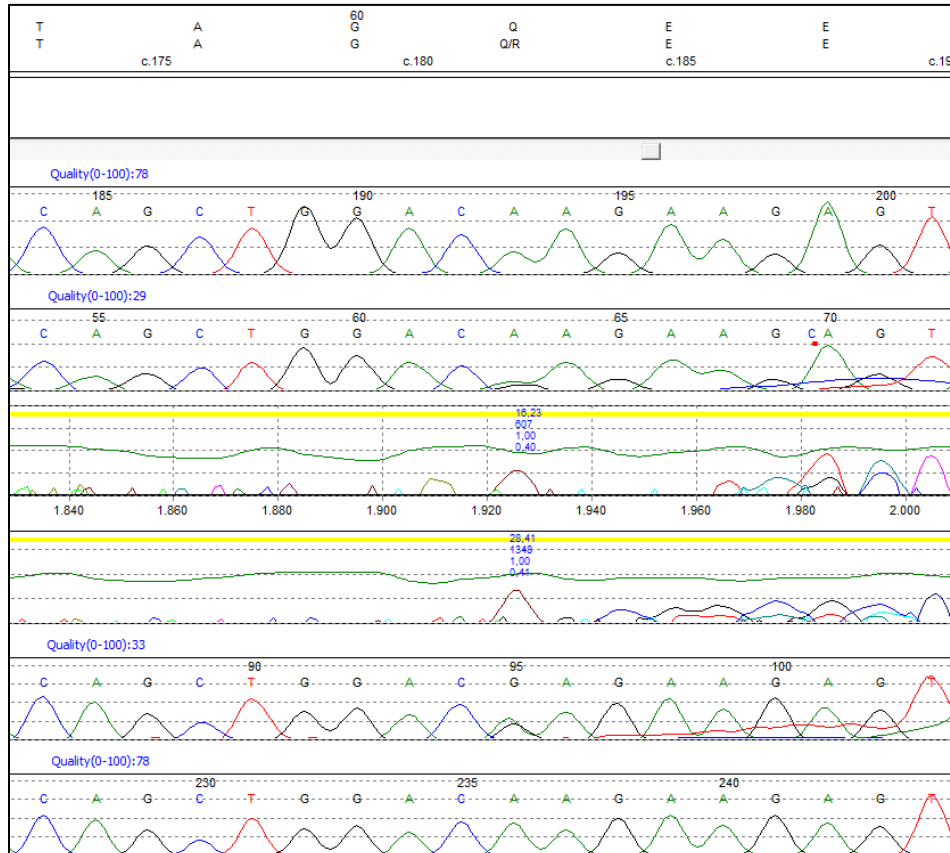

### Left tibia biopsy (ECD sclerotic bone lesion)

#### **Next generation sequencing**

Material: hematoxylin-stained slides

NGTS panel: Diagnostics Panel version 5.1 (DPv5.1).

Genes (exons) analyzed:

Coding sequence: CDKN2A (coverage: 98 %), PTEN (94 %) and TP53 (100 %).

Mutation hotspots: AKT1 (exon: 3), ALK (20, 22-25), APC (14), ARAF (7), BRAF (11, 15), CTNNB1 (3, 7, 8), EGFR (18-21), EZH2 (16), FBXW7 (9, 10), FOXL2 (1), FGFR1 (4, 7, 12), FGFR2 (7, 9, 12), FGFR3 (7, 9), GNA11 (4, 5), GNAQ (4, 5), GNAS (8, 9), HER2 (19-21), HRAS (2-4), IDH1 (4), IDH2 (4), KIT (8, 9, 11, 13, 14, 17), KRAS (2-4), MAP2K1 (2, 3), MET (2, 14, 19), MYD88 (5), NOTCH1 (26, 27), NRAS (2-4), PDGFRA (12, 14, 18), PIK3CA (10, 21), POLD1 (12), POLE (9, 13), RAF1 (7), RET (11, 16), RNF43 (3, 4, 9), ROS1 (38, 41), SMAD4 (3, 9, 12) and STK11 (4, 5, 8).

Not-coding sequence: TERT promoter.

Variant(s) detected:

Mutation in NRAS (NM\_002524) exon 3; c.182A>G; p.Q61R, variant allele frequency: 37%, 457/1232 reads.

### Skin biopsy (ECD xanthelasma-like skin lesion)

#### **Next generation sequencing**

Material: hematoxylin-stained slides

NGTS panel: Diagnostics Panel version 5.1 (DPv5.1).

Variant(s) detected:

Mutation in NRAS (NM\_002524) exon 3; c.182A>G; p.Q61R, variant allele frequency: 37%, 262/701 reads.

### Bone marrow aspirate (mixed AML/ECD bone marrow)

#### **Next generation sequencing**

Material: 6mL EDTA bone marrow aspirate

NGTS panel: NGS Illumina TruSight Myeloid Sequencing panel

Genes (exons) analyzed:

| Gene          | Target Region (exon) | Gene            | Target Region (exon) | Gene          | Target Region (exon) | Gene          | Target Region (exon) |
|---------------|----------------------|-----------------|----------------------|---------------|----------------------|---------------|----------------------|
| <i>ABL1</i>   | 4-6                  | <i>DNMT3A</i>   | full                 | <i>KDM6A</i>  | full                 | <i>RAD21</i>  | full                 |
| <i>ASXL1</i>  | 12                   | <i>ETV6/TEL</i> | full                 | <i>KIT</i>    | 2,8-11,13,17         | <i>RUNX1</i>  | full                 |
| <i>ATRX</i>   | 8-10,17-31           | <i>EZH2</i>     | full                 | <i>KRAS</i>   | 2,3                  | <i>SETBP1</i> | 4 (partial)          |
| <i>BCOR</i>   | full                 | <i>FBXW7</i>    | 9-11                 | <i>MLL</i>    | 5-8                  | <i>SF3B1</i>  | 13-16                |
| <i>BCORL1</i> | full                 | <i>FLT3</i>     | 14,15,20             | <i>MPL</i>    | 10                   | <i>SMC1A</i>  | 2,11,16,17           |
| <i>BRAF</i>   | 15                   | <i>GATA1</i>    | 2                    | <i>MYD88</i>  | 3-5                  | <i>SMC3</i>   | 10,13,19,23,25,28    |
| <i>CALR</i>   | 9                    | <i>GATA2</i>    | 2-6                  | <i>NOTCH1</i> | 26-28,34             | <i>SRSF2</i>  | 1                    |
| <i>CBL</i>    | 8,9                  | <i>GNAS</i>     | 8,9                  | <i>NPM1</i>   | 12                   | <i>STAG2</i>  | full                 |
| <i>CBLB</i>   | 9,10                 | <i>HRAS</i>     | 2,3                  | <i>NRAS</i>   | 2,3                  | <i>TET2</i>   | 3-11                 |
| <i>CBLC</i>   | 9,10                 | <i>IDH1</i>     | 4                    | <i>PDGFRA</i> | 12,14,18             | <i>TP53</i>   | 2-11                 |
| <i>CDKN2A</i> | full                 | <i>IDH2</i>     | 4                    | <i>PHF6</i>   | full                 | <i>U2AF1</i>  | 2,6                  |
| <i>CEBPA</i>  | full                 | <i>IKZF1</i>    | full                 | <i>PTEN</i>   | 5,7                  | <i>WT1</i>    | 7,9                  |
| <i>CSF3R</i>  | 14-17                | <i>JAK2</i>     | 12,14                | <i>PTPN11</i> | 3,13                 | <i>ZRSR2</i>  | full                 |
| <i>CUX1</i>   | full                 | <i>JAK3</i>     | 13                   |               |                      |               |                      |

Variant(s) detected:

Mutation in NRAS (NM\_002524) exon 3; c.182A>G; p.Q61R, variant allele frequency: 44%, 464/1064 reads.
